# Supplementary material
Source: publisher figshare collection journal article supplement (https://gsajournals.figshare.com/ndownloader/files/13477064)
Supplement: Supplementary file 1 [file 13477064]

**Table S7.** List of SNPs significantly associated with stripe rust resistance and showing high LD (*r*2 > 0.5) with the Ventriup marker.

| **Phenotypes** | **Chrom** | **SNP marker** | | | **LD (*r*2 > 0.5)** |
| --- | --- | --- | --- | --- | --- |
| **Name** | **P-value** | **FDR** |  |
| GH_2010_YR_SD | 2AS | 5257853_2as-6493 | 8.6E-06 | 0.0110 | 0.82 |
| ROS_2010_YR_IT2 | 2AS | 5297334_2as-3862 | 5.4E-04 | 0.0381 | 0.67 |
| GH_2010_YR_SD | 2AS | Kukri_c4698_3401 | 2.5E-05 | 0.0269 | 0.76 |
